# Supplementary material for: The Effect of Chitin Size, Shape, Source and Purification Method on Immune Recognition
Source: PubMed Central journal article supplement (PMC6271096; doi:10.3390/molecules19044433), 2014-04-10
Supplement: molecules-19-04433-s001.pdf [file molecules-19-04433-s001.pdf]

## Supplementary Materials

**Figure S1.** Representative images of the different fungal cultures at the time of harvest. (A) *C. albicans* yeast cells; (B) *C. albicans* hyphae; (C) *A. fumigatus* hyphae; (D) *M. circinelloides* hyphae. Bars, 50  $\mu\text{m}$ .

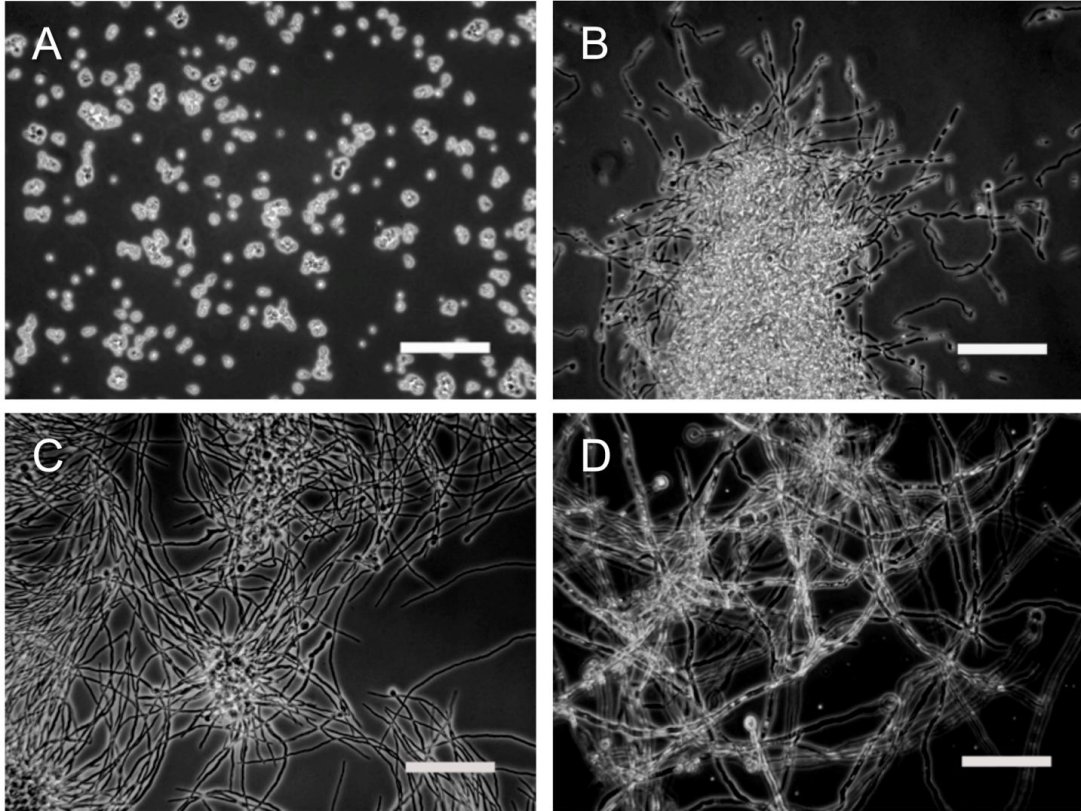

**Figure S2.** Endosomal transfection of 2 k chitin particles. The incubation of 10 µg/mL chitin particles with 10 µg/mL DOTAP significantly increases the induction of pro-inflammatory cytokines. As a control, incubation of PBMCs with 1 µM latrunculin A for 1 h before exposure to chitin blocks the uptake. (A) IL-6; (B) IL-1β; (C) IL-10.

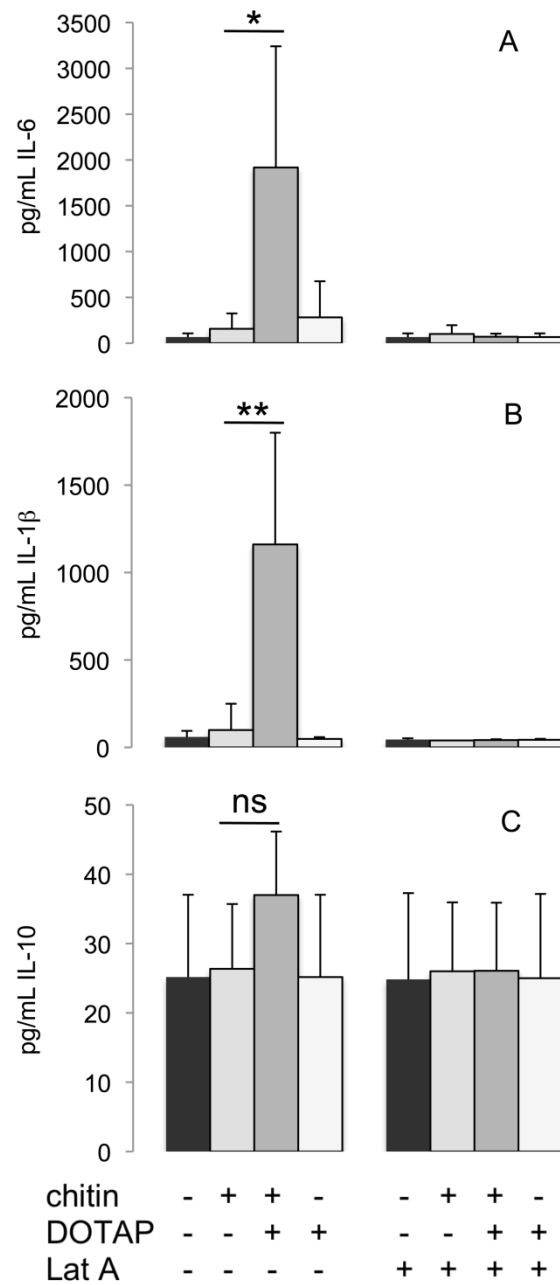

Note: The 2 k chitin samples used for this experiment had been obtained using a more primitive protocol that included an autoclaving step in acid followed by KOH boils. \*  $p < 0.05$ ; \*\*  $p < 0.001$ ; ns = not significant.
